# Supplementary material
Source: publisher figshare collection journal article supplement (https://gsapubs.figshare.com/ndownloader/files/26669471)
Supplement: Supplementary file 1 [file 26669471]

## Sheet: Sheet1
	Table S2. Transect Locations
	Study Area, Transect	Western End Point		Eastern End Point		Transect Length
		Easting*	Northing*	Easting*	Northing*
		(m)	(m)	(m)	(m)	(m)
Area D Tirohanga	Area A, transect 1	1679697	5350302	1679774	5350344	87.4
KekF3_east	Area A, transect 2	1679851	5350390	1679866	5350406	39
	Area B (no transects)
KekF3_central	Area C, transect 1	1684367	5352660	1684418	5352683	57
KekF3_west	Area C, transect 2	1684418	5352683	1684515	5352747	115
KekF3_far_west	Area C, transect 3	1.68451e+06	5.35275e+06	1.68464e+06	5352802	135
East Lane _east	Area C, transect 4	1684687	5352811	1684730	5352818	44
East Lane _central	Area D, transect 1	1686662	5353777	1686679	5353785	19
	*New Zealand Transverse Mercator (NZTM) Projection
	referenced to New Zealand Geodetic Datum 2000 (NZGD2000 )
